# Supplementary material for: Neoadjuvant treatment of Dermatofibrosarcoma Protuberans of pancreas with Imatinib: case report and systematic review of literature
Source: Clin Sarcoma Res. 2014 Aug 6;4:8. doi: 10.1186/2045-3329-4-8 (PMC4179866; doi:10.1186/2045-3329-4-8)
Supplement: Additional file 5 — Summary of the case reports and series utilizing Imatinib for the treatment of pediatric patients with Dermatofibrosarcoma Protuberans. [file 2045-3329-4-8-S5.xlsx]

## Sheet: Sheet1
Table 5 Summary of pediatric case reports and series utilizing Imatinib for the treatment of patients with Dermatofibrosarcoma Protuberans
Authors	Year	Journal	Type	Total patients	Location	Histologic Subtype	Locally advanced primary	Local Recurrence	Metastatic	Pre Imatinib Characterization	Post imatinib response	Reported response	Molecular characteristics	Dose	Duration of neoadjuvant/palliative therapy	Adjuvant treatment	Follow up
Price et al	2005	Pediatric Blood Cancer	Case report	1	Right calf	DFSP	Yes	-	-	Clinical - 5x5 cm mass. MRI measurement 4.5 x 3.5 x 1 cm. Subcutaneous thickness 9.8 x 8.1 cm.	Clinical - no palpable mass. Circumferential area of skin discoloration.	Partial response	CD34 and vimentin positive. FISH + for 17, 22 translocation	400 mg/m2/day slowly escalated to 520 mg/m2/day	23 weeks	-	23 weeks
Gooskens et al	2010	Pediatric Blood Cancer	Case series/ 3 patients	Case 1 - 14 year old	Skull	DFSP	-	Yes	-	Recurrent scalp lesion excised x 3	30% reduction in tumor size	Partial response	COL 1A1- PDGFB positive by PCR	400 mg/m2/day	6 months	12 months as fusion transcipts were found at the margin	3.5 years and patient disease free
				Case 2 - 12 month old	Right buttock	Congenital DFSP	Yes	-	-	-	Tumor became more superficial, was less nodular, turned pale and lesions were less infiltrative on MRI	Partial response	COL1A1-PDGFB positive	500 mg/m2/day	12 months	No adjuvant treatment as margin was negative for fusion transcripts	3 years and patient diease free
				Case 3 - 3 year old	Left groin extending into funiculus	DFSP - Giant cell fibroblastoma	Yes	-	-	-	-	Partial response	COL1A1-PDGFB positive	500 mg/m2/day	6 months	3 months as fusion transcripts were noted at the margin	6 months and patient remains in complete remission
Suzuki et al	2010	Journal of Pediatric Hematology and Oncology	Case report	1	Back	DFSP	Yes	-	-	Imatinib given after surgical debulking. Patient also received postoperative radiation - 2 courses (40 Gray/25 fractions and 16 Gray/ 10 fractions)	No progression of disease at 1 year	-	CD 34+, FISH positive for Collage PDGF chimeric gene	50 mg PO/day	-	1 year	1 year from the time of starting imatinib
Rios et al	2014	Journal of Cutaneous Medicine and Surgery	Case series	1/17 patient prescribed imatinib	-	DFSP	Yes	-	-	-	-	Partial response	-	-	11 months	-	-
